# Supplementary material
Source: Springer Nature journal article supplement (https://www.springermedizin.de/resource/supplementary/12879_2004_146_MOESM2_ESM.pdf/9448252)

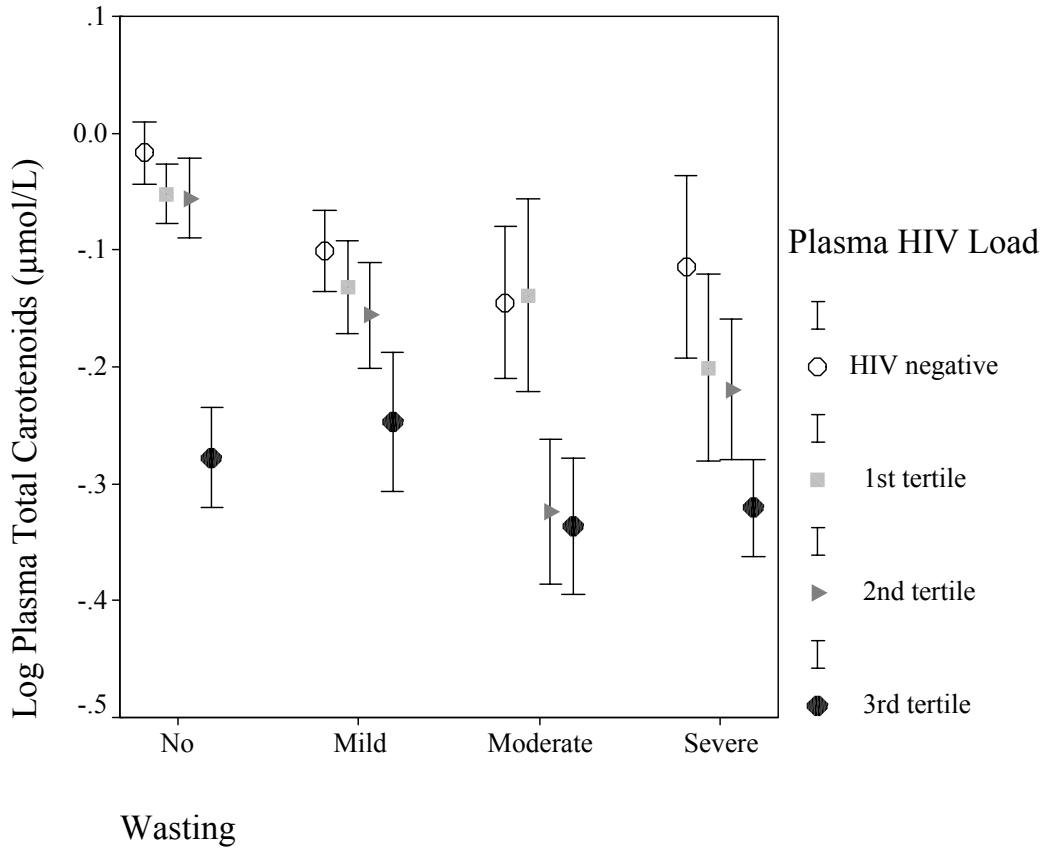

Supplement: MOESM2 [file 9448252]
